# Supplementary material for: Canine Behavioral Assessment and Research Questionnaire (C-BARQ): Validation of the Italian Translation
Source: MDPI journal article supplement (doi:10.3390/ani13071254), 2023-04-05
Supplement: s1 [file s1]

Table S1: The administered Italian questionnaire.

| Risposta all'addestramento                                                                                                                                                             |
|----------------------------------------------------------------------------------------------------------------------------------------------------------------------------------------|
| Alcuni cani sono più obbedienti e addestrabili di altri. Ripensando agli ultimi mesi, indica quanto spesso il tuo cane ha risposto come descritto in ognuna delle seguenti situazioni: |
| 1. Quando è senza guinzaglio torna subito quando richiamato                                                                                                                            |
| 2. Ubbidisce immediatamente al comando "seduto" *                                                                                                                                      |
| 3. Ubbidisce immediatamente al comando "resta"                                                                                                                                         |
| 4. Sembra prestare attenzione/ascoltare attentamente tutto ciò che dici e/o fai                                                                                                        |
| 5. Risponde lentamente a correzioni o punizioni, ha "la testa dura"                                                                                                                    |
| 6. È lento nell'apprendere nuovi esercizi/compiti                                                                                                                                      |
| 7. È facilmente distratto da rumori, odori o dalla vista di cose interessanti *                                                                                                        |
| 8. Riporta o prova a riportare legnetti, palline o altri oggetti *                                                                                                                     |

| Aggressività                                                                                                                                                                                                                                                                                                                                                                                                                                                                                                                                                         |
|----------------------------------------------------------------------------------------------------------------------------------------------------------------------------------------------------------------------------------------------------------------------------------------------------------------------------------------------------------------------------------------------------------------------------------------------------------------------------------------------------------------------------------------------------------------------|
| Alcuni cani di tanto in tanto esibiscono comportamenti aggressivi. Abbaiare, ringhiare e mostrare i denti sono segni tipici di moderata aggressività. Un'aggressività più grave generalmente include i seguenti comportamenti: scagliarsi contro qualcuno, mordere o tentare di mordere. Ripensando agli ultimi mesi, indica la tendenza del tuo cane a manifestare comportamenti aggressivi, in ciascuna delle situazioni descritte sotto. Scegli un valore da 0 a 4, dove 0 indica nessun segno di aggressività, e 4 la presenza di segni di aggressività elevata. |
| 9. Quando viene corretto o punito verbalmente (rimproverato, sgridato, etc.) da te o da un altro membro del nucleo familiare                                                                                                                                                                                                                                                                                                                                                                                                                                         |
| 10. Quando viene avvicinato in maniera diretta da una persona adulta sconosciuta, mentre passeggia o fa attività al guinzaglio                                                                                                                                                                                                                                                                                                                                                                                                                                       |
| 11. Quando viene avvicinato in maniera diretta da un bambino sconosciuto, mentre è passeggia o fa attività al guinzaglio                                                                                                                                                                                                                                                                                                                                                                                                                                             |
| 12. Nei confronti di persone sconosciute che si avvicinano al cane quando è in macchina (per esempio, dal benzinaio)                                                                                                                                                                                                                                                                                                                                                                                                                                                 |
| 13. Quando gli vengono portati via giocattoli, ossi o altri oggetti, da un membro del nucleo familiare                                                                                                                                                                                                                                                                                                                                                                                                                                                               |
| 14. Quando viene lavato o spazzolato da un membro del nucleo familiare *                                                                                                                                                                                                                                                                                                                                                                                                                                                                                             |
| 15. Quando una persona sconosciuta si avvicina a te o ad un altro membro del nucleo familiare, in casa                                                                                                                                                                                                                                                                                                                                                                                                                                                               |
| 16. Quando delle persone sconosciute si avvicinano a te o ad un altro membro del nucleo familiare, fuori casa                                                                                                                                                                                                                                                                                                                                                                                                                                                        |
| 17. Quando viene avvicinato in maniera diretta da te o da un altro membro del nucleo familiare, mentre (il cane) sta mangiando                                                                                                                                                                                                                                                                                                                                                                                                                                       |
| 18. Quando un fattorino o il postino si avvicina a casa                                                                                                                                                                                                                                                                                                                                                                                                                                                                                                              |
| 19. Quando gli viene portato via il cibo da un membro del nucleo familiare                                                                                                                                                                                                                                                                                                                                                                                                                                                                                           |
| 20. Quando degli estranei passano davanti a casa mentre il cane è fuori casa, in giardino/cortile *                                                                                                                                                                                                                                                                                                                                                                                                                                                                  |
| 21. Quando una persona sconosciuta cerca di toccare o accarezzare il cane                                                                                                                                                                                                                                                                                                                                                                                                                                                                                            |
| 22. Quando ciclisti, gente che fa jogging, persone su skateboard o pattini passano davanti a casa mentre il cane è fuori casa, in cortile/giardino *                                                                                                                                                                                                                                                                                                                                                                                                                 |

|                                                                                                                                                                                                                 |
|-----------------------------------------------------------------------------------------------------------------------------------------------------------------------------------------------------------------|
| 23. Quando viene avvicinato in maniera diretta da un cane maschio sconosciuto mentre è a passeggio al guinzaglio                                                                                                |
| 24. Quando viene avvicinato in maniera diretta da un cane femmina sconosciuto mentre è a passeggio al guinzaglio                                                                                                |
| 25. Quando viene guardato fisso negli occhi da un membro del nucleo familiare *                                                                                                                                 |
| 26. Nei confronti di cani sconosciuti in visita a casa vostra                                                                                                                                                   |
| 27. Nei confronti di gatti, scoiattoli o altri animali che entrano nel vostro giardino                                                                                                                          |
| 28. Nei confronti di persone sconosciute in visita a casa vostra                                                                                                                                                |
| 29. Quando un cane (sconosciuto) gli abbaia, gli ringhia o gli si scaglia contro                                                                                                                                |
| 30. Quando un membro del nucleo familiare lo scavalca/gli passa sopra *                                                                                                                                         |
| 31. Quando tu o un altro membro del nucleo familiare vi riprendete del cibo o degli oggetti precedentemente rubati dal cane                                                                                     |
| Ci sono altre situazioni in cui il tuo cane mostra, a volte, un comportamento aggressivo? Si/no/non so                                                                                                          |
| 32. Nei confronti di un altro cane (conosciuto) che vive nella stessa casa (lasciare vuoto se non ci sono altri cani in casa). *                                                                                |
| 33. Quando viene avvicinato da un altro cane (conosciuto) che vive nella stessa casa mentre si trova nella sua cuccia/luogo di riposo preferita/o (lasciare vuoto se non ci sono altri cani in casa). *         |
| 34. Quando viene avvicinato da un altro cane (conosciuto) che vive nella stessa casa, mentre sta mangiando (lasciare vuoto se non ci sono altri cani in casa). *                                                |
| 35. Quando viene avvicinato da un altro cane (conosciuto) che vive nella stessa casa mentre mastica/gioca con un giocattolo preferito, osso, oggetto etc. (lasciare vuoto se non ci sono altri cani in casa). * |

| Paura e ansia                                                                                                                                                                                                                                                                                                                                                                                                                                                                                                                                                                                                                                                                                                                                                                                                                                                   |
|-----------------------------------------------------------------------------------------------------------------------------------------------------------------------------------------------------------------------------------------------------------------------------------------------------------------------------------------------------------------------------------------------------------------------------------------------------------------------------------------------------------------------------------------------------------------------------------------------------------------------------------------------------------------------------------------------------------------------------------------------------------------------------------------------------------------------------------------------------------------|
| I cani a volte mostrano segni di ansia o di paura, quando sono esposti a rumori, oggetti, persone o situazioni particolari. Tipici segni di lieve o moderata paura includono i seguenti comportamenti: evitare lo sguardo, evitare l'oggetto temuto, appiattirsi a terra o rannicchiarsi con la coda bassa o tra le zampe, uggiolare o guaire, immobilizzarsi e tremare. Una paura estrema è caratterizzata da comportamenti quali: appiattirsi o rannicchiarsi in maniera esagerata, effettuare tentativi vigorosi di fuga, allontanarsi o nascondersi dall'oggetto, dalla persona o dalla situazione temuti. Ripensando agli ultimi mesi, indica la tendenza del tuo cane a mostrare paura o ansia nelle situazioni descritte in seguito. Scegli un valore da 0 a 4, dove 0 indica nessun segno di paura/ansia, e 4 indica un livello estremo di paura/ansia. |
| 36. Quando viene avvicinato in maniera diretta da una persona adulta sconosciuta, non in casa                                                                                                                                                                                                                                                                                                                                                                                                                                                                                                                                                                                                                                                                                                                                                                   |
| 37. Quando viene avvicinato in maniera diretta da un bambino sconosciuto, fuori casa                                                                                                                                                                                                                                                                                                                                                                                                                                                                                                                                                                                                                                                                                                                                                                            |
| 38. In risposta a rumori improvvisi o forti (ad esempio: aspirapolvere, rombi di motori, martello pneumatico, oggetti che cadono accidentalmente)                                                                                                                                                                                                                                                                                                                                                                                                                                                                                                                                                                                                                                                                                                               |
| 39. Quando delle persone sconosciute vengono a casa vostra                                                                                                                                                                                                                                                                                                                                                                                                                                                                                                                                                                                                                                                                                                                                                                                                      |
| 40. Quando una persona sconosciuta cerca di toccarlo o accarezzarlo                                                                                                                                                                                                                                                                                                                                                                                                                                                                                                                                                                                                                                                                                                                                                                                             |
| 41. In situazioni di traffico auto intenso                                                                                                                                                                                                                                                                                                                                                                                                                                                                                                                                                                                                                                                                                                                                                                                                                      |
| 42. In risposta a oggetti strani e poco familiari, che si trovano sul marciapiedi o vicino ad esso (ad esempio sacchetti dalla spazzatura, foglie, cartacce, bandiere sventolanti, etc.) *                                                                                                                                                                                                                                                                                                                                                                                                                                                                                                                                                                                                                                                                      |
| 43. Quando viene visitato/medicato dal veterinario *                                                                                                                                                                                                                                                                                                                                                                                                                                                                                                                                                                                                                                                                                                                                                                                                            |
| 44. Durante temporali, fuochi d'artificio o eventi simili *                                                                                                                                                                                                                                                                                                                                                                                                                                                                                                                                                                                                                                                                                                                                                                                                     |
| 45. Quando viene avvicinato in maniera diretta da un cane sconosciuto della stessa taglia o più grande                                                                                                                                                                                                                                                                                                                                                                                                                                                                                                                                                                                                                                                                                                                                                          |

|                                                                                                                                                                                    |
|------------------------------------------------------------------------------------------------------------------------------------------------------------------------------------|
| 46. Quando viene avvicinato in maniera diretta da un cane di taglia più piccola                                                                                                    |
| 47. Quando si è trovato, per la prima volta, in situazioni sconosciute (per esempio: il primo viaggio in macchina, la prima volta in ascensore, la prima visita dal veterinario) * |
| 48. Quando c'è vento o ci sono oggetti mossi dal vento                                                                                                                             |
| 49. Quando gli vengono tagliate le unghie da un membro del nucleo familiare                                                                                                        |
| 50. Quando viene spazzolato o lavato da un membro del nucleo familiare                                                                                                             |
| 51. Quando gli vengono asciugate le zampe da un membro del nucleo familiare                                                                                                        |
| 52. Quando cani sconosciuti vengono a casa vostra                                                                                                                                  |
| 53. Quando un cane sconosciuto gli abbaia, gli ringhia o gli si scaglia contro                                                                                                     |

| Comportamenti relativi a momenti di separazione                                                                                                                                                                                                                                                                                 |
|---------------------------------------------------------------------------------------------------------------------------------------------------------------------------------------------------------------------------------------------------------------------------------------------------------------------------------|
| Alcuni cani mostrano segni di ansia o altri comportamenti problematici, quando vengono lasciati soli, anche per periodi relativamente brevi. Ripensando agli ultimi mesi, indica quanto spesso il tuo cane ha risposto come descritto nei seguenti punti, quando è stato lasciato solo, o appena prima di essere lasciato solo. |
| 54. Scuotersi, rabbrivire, tremare                                                                                                                                                                                                                                                                                              |
| 55. Salivazione eccessiva                                                                                                                                                                                                                                                                                                       |
| 56. Irrequietezza/agitazione/camminare incessantemente                                                                                                                                                                                                                                                                          |
| 57. Uggiolare                                                                                                                                                                                                                                                                                                                   |
| 58. Abbaire                                                                                                                                                                                                                                                                                                                     |
| 59. Ululare                                                                                                                                                                                                                                                                                                                     |
| 60. Rosicchiare/grattare porte, finestre, pavimenti, tende, etc. *                                                                                                                                                                                                                                                              |
| 61. Perdita di appetito *                                                                                                                                                                                                                                                                                                       |
| Ci sono altre situazioni in cui il tuo cane ha paura o è ansioso? Si / No / Non so                                                                                                                                                                                                                                              |

| Eccitabilità                                                                                                                                                                                                                                                                                                                                                                                                                                                                                                                                                                                                                                                                                                                                                                                                                                                 |
|--------------------------------------------------------------------------------------------------------------------------------------------------------------------------------------------------------------------------------------------------------------------------------------------------------------------------------------------------------------------------------------------------------------------------------------------------------------------------------------------------------------------------------------------------------------------------------------------------------------------------------------------------------------------------------------------------------------------------------------------------------------------------------------------------------------------------------------------------------------|
| Alcuni cani non mostrano reazioni evidenti a eventi improvvisi o potenzialmente eccitanti, né a cambiamenti nel loro ambiente; altri invece si eccitano molto alla più piccola novità. I seguenti comportamenti sono segni di una eccitabilità da lieve a moderata: allerta, dirigersi verso la situazione/oggetto nuovo, brevi episodi di abbaio. L'estrema eccitabilità è caratterizzata da una generale tendenza a reagire in maniera esagerata. Il cane eccitabile abbaia o guaisce in modo isterico al più piccolo cambiamento, corre incontro o tutto attorno a quel che lo eccita ed è difficile da calmare. Ripensando agli ultimi mesi, indica la tendenza del tuo cane a mostrare un comportamento eccitabile nelle circostanze descritte in seguito. Scegli un valore da 0 a 4, dove 0 indica un cane calmo, e 4 un cane estremamente eccitabile. |
| 62. Quando tu o un altro membro del nucleo familiare tornate a casa dopo un breve periodo di assenza *                                                                                                                                                                                                                                                                                                                                                                                                                                                                                                                                                                                                                                                                                                                                                       |
| 63. Quando gioca con te o altri membri del nucleo familiare *                                                                                                                                                                                                                                                                                                                                                                                                                                                                                                                                                                                                                                                                                                                                                                                                |
| 64. Quando suona il citofono/campanello                                                                                                                                                                                                                                                                                                                                                                                                                                                                                                                                                                                                                                                                                                                                                                                                                      |
| 65. Appena prima di essere portato fuori per una passeggiata                                                                                                                                                                                                                                                                                                                                                                                                                                                                                                                                                                                                                                                                                                                                                                                                 |
| 66. Appena prima di essere portato in giro in macchina                                                                                                                                                                                                                                                                                                                                                                                                                                                                                                                                                                                                                                                                                                                                                                                                       |
| 67. Quando arriva gente a casa *                                                                                                                                                                                                                                                                                                                                                                                                                                                                                                                                                                                                                                                                                                                                                                                                                             |

|                                                                                                        |
|--------------------------------------------------------------------------------------------------------|
| Ci sono altre situazioni in cui il tuo cane, a volte, diventa eccessivamente agitato? Si / No / Non so |
|--------------------------------------------------------------------------------------------------------|

|                                                                                                                                                                                                                                                                                                  |
|--------------------------------------------------------------------------------------------------------------------------------------------------------------------------------------------------------------------------------------------------------------------------------------------------|
| <b>Attaccamento e ricerca di attenzione</b>                                                                                                                                                                                                                                                      |
| La maggior parte dei cani è fortemente attaccata al loro proprietario, e alcuni di loro richiedono una grande quantità di attenzioni e affetto. Ripensando all'ultimo periodo, indica quanto spesso il tuo cane ha mostrato ognuno dei seguenti segni di attaccamento o richiesta di attenzione. |
| 68. Mostra un forte attaccamento verso uno specifico membro della famiglia                                                                                                                                                                                                                       |
| 69. Tende a seguire te (o altri membri del nucleo familiare) in giro per casa, di stanza in stanza                                                                                                                                                                                               |
| 70. Tende a sedersi vicino o a contatto con te (o altri) quando siete seduti                                                                                                                                                                                                                     |
| 71. Tende a dare colpetti con il naso o dare zampate per ottenere attenzione da te (o altri) quando siete seduti                                                                                                                                                                                 |
| 72. Si agita (uggiola, salta addosso, cerca di mettersi in mezzo) se tu (o altri) mostrate affetto per un'altra persona                                                                                                                                                                          |
| 73. Si agita (uggiola, salta addosso, cerca di mettersi in mezzo) quando tu (o altri) mostrate affetto per un altro cane/animale                                                                                                                                                                 |

|                                                                                                                                                                                                                                       |
|---------------------------------------------------------------------------------------------------------------------------------------------------------------------------------------------------------------------------------------|
| <b>Altri comportamenti</b>                                                                                                                                                                                                            |
| I cani mostrano un'ampia gamma di problemi comportamentali oltre a quelli precedentemente menzionati nel questionario. Ripensando all'ultimo periodo, indica quanto spesso il tuo cane ha mostrato ognuno dei seguenti comportamenti: |
| 74. Rincorre i gatti, o li rincorrerebbe se ne avesse la possibilità                                                                                                                                                                  |
| 75. Rincorre gli uccelli, o li rincorrerebbe se ne avesse la possibilità                                                                                                                                                              |
| 76. Rincorre gli scoiattoli o li rincorrerebbe se ne avesse la possibilità                                                                                                                                                            |
| 77. Scappa o scapperebbe da casa, o dal giardino/cortile (se ne avesse la possibilità)                                                                                                                                                |
| 78. Si rotola nelle feci di animali o in altre sostanze "puzzolenti" *                                                                                                                                                                |
| 79. Mangia i propri escrementi o bisogni, o quelli di altri animali *                                                                                                                                                                 |
| 80. Rosicchia oggetti inappropriati                                                                                                                                                                                                   |
| 81. "Monta" oggetti, mobili o persone *                                                                                                                                                                                               |
| 82. Elemosina cibo in continuazione quando la gente mangia *                                                                                                                                                                          |
| 83. Ruba cibo *                                                                                                                                                                                                                       |
| 84. È ansioso o ha paura di scendere e/o salire le scale *                                                                                                                                                                            |
| 85. Tira eccessivamente quando è al guinzaglio *                                                                                                                                                                                      |
| 86. Urina su mobili o altri oggetti in casa                                                                                                                                                                                           |
| 87. Urina quando viene avvicinato, accarezzato, manipolato o preso in braccio *                                                                                                                                                       |
| 88. Urina se lasciato solo di notte o di giorno                                                                                                                                                                                       |
| 89. Defeca se lasciato solo di notte o di giorno                                                                                                                                                                                      |
| 90. E' iperattivo e irrequieto, ha difficoltà a calmarsi *                                                                                                                                                                            |
| 91. Giocherellone, cucciolone, esuberante                                                                                                                                                                                             |
| 92. Attivo, energico, deve sempre fare qualcosa                                                                                                                                                                                       |

|                                                                 |
|-----------------------------------------------------------------|
| 93. Tiene lo sguardo fisso nel vuoto *                          |
| 94. Sembra voler catturare le mosche (invisibili) *             |
| 95. Si rincorre la coda/il posteriore *                         |
| 96. Rincorre/insegue le ombre o i punti luminosi *              |
| 97. Abbaia ostinatamente quando allarmato o eccitato *          |
| 98. Si lecca eccessivamente *                                   |
| 99. Lecca oggetti o persone eccessivamente *                    |
| 100. Mostra altri comportamenti bizzarri, strani o ripetitivi * |

\* Item not resulting from the factor analysis on the Italian C-BARQ data
